# Supplementary material for: Effects of wax concentration and carbon chain length on the structural modification of fat crystals
Source: Royal Society of Chemistry journal article supplement (doi:10.1039/c9fo00813f), 2019-01-01
Supplement: c9fo00813f1.pdf [file c9fo00813f1.pdf]

1 **Supplementary material**

2 **Table S1 Fatty acid and triglyceride compositions of PKS85.**

| Fatty acid | Total fatty acid compositions (area %) | TAG    | TAG compositions (area %) | Melting point <sup>a</sup> (°C) |
|------------|----------------------------------------|--------|---------------------------|---------------------------------|
| 8:0        | 0.603±0.081                            | CCLa   | 1.422±0.403               | 26.0                            |
| 10:0       | 1.301±0.830                            | CLaLa  | 3.483±0.078               | 31.0                            |
| 12:0       | 46.701±0.502                           | LaLaLa | 26.076±0.009              | 35.1                            |
| 14:0       | 21.117±0.810                           | LaLaM  | 29.269±0.018              | 37.8                            |
| 16:0       | 20.968±0.192                           | LaLaO  | 0.282±0.062               | 18.0                            |
| 18:0       | 2.802±0.169                            | LaMM   | 20.294±0.250              | 42.0                            |
| 18:1       | 5.671±0.172                            | LaMO   | 0.283±0.418               | 23.8                            |
| 18:2       | 0.837±0.082                            | LaPM   | 5.059±1.188               | 46.8                            |
| ∑MCFA      | 48.608                                 | LaOO   | 0.111±0.902               | 0.6                             |
| ∑SFA       | 93.492                                 | LaPO   | 0.241±0.377               | 26.3                            |
| ∑USFA      | 6.508                                  | LaPP   | 0.995±0.108               | 49.5                            |
|            |                                        | MMO    | 0.286±0.020               | 24.8                            |
|            |                                        | MPO    | 0.216±0.060               | 32.4                            |
|            |                                        | POO    | 0.762±0.254               | 17.7                            |
|            |                                        | POP    | 11.221±0.419              | 33.2                            |

3 Ca, Capric; La, Lauric; M, Myristic; P, Palmitic; S, Stearic; O, Oleic; L, Linoleic. Shown are average values and  
4 standard deviations of n=2 replicates. <sup>a</sup>Melting point of TAG Determined using Triglyceride Property Calculator:  
5 An R Shiny App (Marangoni Research Lab, Guelph, ON, Canada, <http://www.crcfoodandhealth.com/services.php>)  
6 based on beta prime polymorphism.

7

8 **Fig. S1** Solid fat content versus time profile during isothermal crystallization of PKS85-CLW and  
9 PKS85-RW at different temperatures of 4 (A) and 20 °C (B).

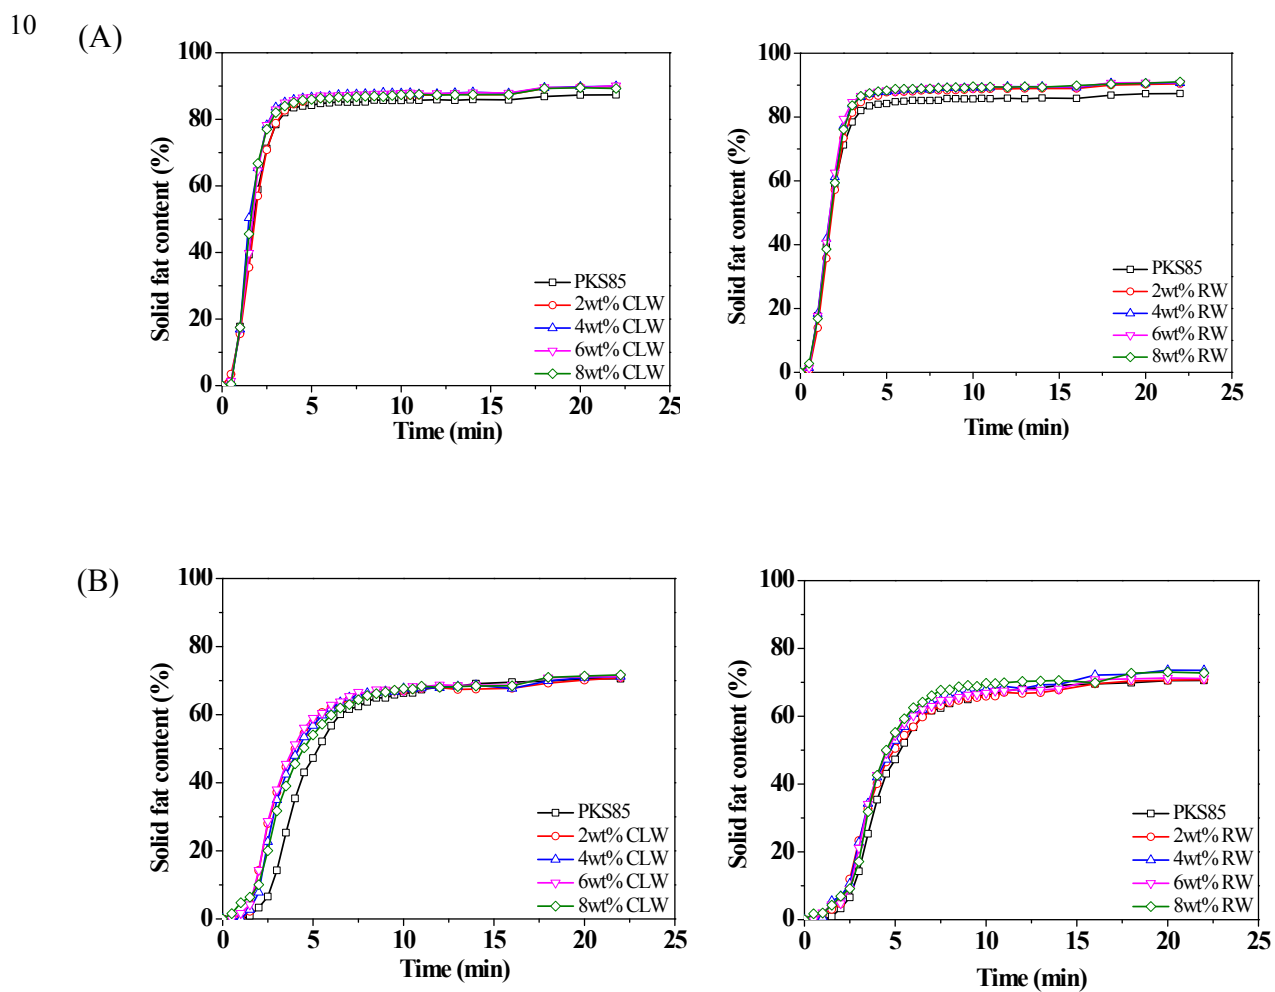

12 **Fig. S2** XRD spectra for long spacings of PKS85-CLW and PKS85-RW after stored at 4 (A) and 20  
 13 °C (B) for 24 h. Inset: magnification of long spacings.

14

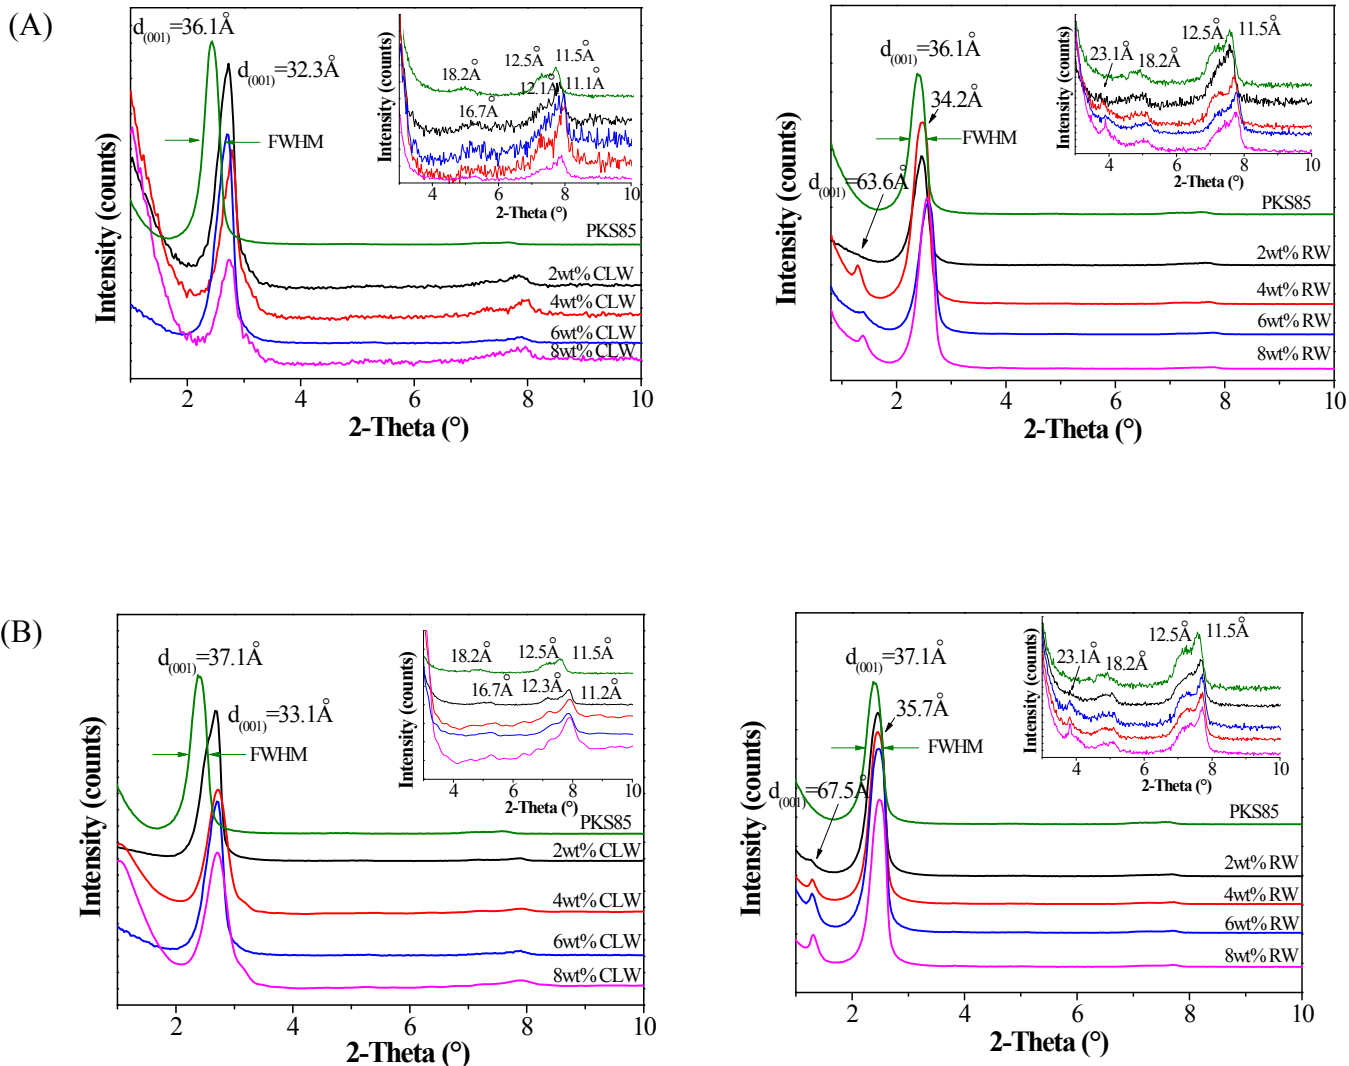

15
